# Supplementary material for: Successful Dissemination of Plasmid-Mediated Extended-Spectrum β-Lactamases in Enterobacterales over Humans to Wild Fauna
Source: MDPI journal article supplement (doi:10.3390/microorganisms9071471), 2021-07-09

**Table S1:** Metadata associated with the *Escherichia coli* isolates sequenced during this study.

| Strain ID    | Species        | Sampling source            | Sample | Country  | Year |
|--------------|----------------|----------------------------|--------|----------|------|
| TB63         | <i>E. coli</i> | Wild animal (Bat)          | Stool  | Portugal | 2014 |
| 1-102        | <i>E. coli</i> | Wild animal (Bird of prey) | Stool  | Portugal | 2008 |
| 13-103       | <i>E. coli</i> | Wild animal (Bird of prey) | Stool  | Portugal | 2008 |
| 2-101        | <i>E. coli</i> | Wild animal (Bird of prey) | Stool  | Portugal | 2008 |
| 21-101       | <i>E. coli</i> | Wild animal (Bird of prey) | Stool  | Portugal | 2008 |
| BU10A        | <i>E. coli</i> | Wild animal (Buzzard)      | Stool  | Portugal | 2007 |
| BU10B        | <i>E. coli</i> | Wild animal (Buzzard)      | Stool  | Portugal | 2007 |
| BU22A        | <i>E. coli</i> | Wild animal (Buzzard)      | Stool  | Portugal | 2007 |
| BU41A        | <i>E. coli</i> | Wild animal (Buzzard)      | Stool  | Portugal | 2007 |
| J31          | <i>E. coli</i> | Wild animal (Wild board)   | Stool  | Portugal | 2006 |
| J64          | <i>E. coli</i> | Wild animal (Wild board)   | Stool  | Portugal | 2006 |
| J69          | <i>E. coli</i> | Wild animal (Wild board)   | Stool  | Portugal | 2006 |
| W4           | <i>E. coli</i> | Wild animal (Wolf)         | Stool  | Portugal | 2008 |
| AURA86       | <i>E. coli</i> | Human                      | Urine  | France   | 2019 |
| BLSE107-2012 | <i>E. coli</i> | Human                      | Urine  | France   | 2012 |
| BLSE11-2012  | <i>E. coli</i> | Human                      | Urine  | France   | 2012 |
| BLSE114-2012 | <i>E. coli</i> | Human                      | Blood  | France   | 2012 |

|              |                |       |                   |        |      |
|--------------|----------------|-------|-------------------|--------|------|
| BLSE119-2018 | <i>E. coli</i> | Human | Skin              | France | 2018 |
| BLSE120-2012 | <i>E. coli</i> | Human | Respiratory tract | France | 2012 |
| BLSE124-2012 | <i>E. coli</i> | Human | Blood             | France | 2012 |
| BLSE128-2012 | <i>E. coli</i> | Human | Urine             | France | 2012 |
| BLSE143-2012 | <i>E. coli</i> | Human | Urine             | France | 2012 |
| BLSE171-2012 | <i>E. coli</i> | Human | Urine             | France | 2012 |
| BLSE17-2012  | <i>E. coli</i> | Human | Urine             | France | 2012 |
| BLSE175-2012 | <i>E. coli</i> | Human | Blood             | France | 2012 |
| BLSE179-2018 | <i>E. coli</i> | Human | Urine             | France | 2018 |
| BLSE192-2012 | <i>E. coli</i> | Human | Biopsie           | France | 2012 |
| BLSE193-2018 | <i>E. coli</i> | Human | Urine             | France | 2018 |
| BLSE200-2012 | <i>E. coli</i> | Human | Urine             | France | 2012 |
| BLSE27-2012  | <i>E. coli</i> | Human | Urine             | France | 2012 |
| BLSE34-2012  | <i>E. coli</i> | Human | Urine             | France | 2012 |
| BLSE41-2018  | <i>E. coli</i> | Human | Urine             | France | 2018 |
| BLSE77-2012  | <i>E. coli</i> | Human | Urine             | France | 2012 |
| BLSE93-2012  | <i>E. coli</i> | Human | Urine             | France | 2012 |
| CNR1626      | <i>E. coli</i> | Human | Stool             | France | 2016 |
| CNR3515      | <i>E. coli</i> | Human | Stool             | France | 2019 |
| CVL138       | <i>E. coli</i> | Human | Urine             | France | 2019 |

|       |                |       |                   |                        |      |
|-------|----------------|-------|-------------------|------------------------|------|
| NC105 | <i>E. coli</i> | Human | Blood             | France (New Caledonia) | 2014 |
| PAP34 | <i>E. coli</i> | Human | Urine             | France (Guadeloupe)    | 2013 |
| PAP37 | <i>E. coli</i> | Human | Urine             | France (Guadeloupe)    | 2013 |
| PAP43 | <i>E. coli</i> | Human | Respiratory tract | France (Guadeloupe)    | 2013 |
| GHSR6 | <i>E. coli</i> | Human | Urine             | France (Reunion)       | 2013 |
| PAP45 | <i>E. coli</i> | Human | Urine             | France (Guadeloupe)    | 2013 |

---

**Table S2:** Dataset of *Escherichia coli* whole genome sequences (WGSs) containing replicon IncI1-ST3 encoding *bla*<sub>CTX-M-1</sub>.

| Biosample accession number | Achtman's Ecoli ST | Achtman's ST clonal complex | Phylogroup | Sampling source            | Year | Country             |
|----------------------------|--------------------|-----------------------------|------------|----------------------------|------|---------------------|
| SAMEA6471237 <sup>a</sup>  | 1998               | ST23 Cplx                   | C          | wild animal (wild boar)    | 2006 | Portugal            |
| SAMEA6471229 <sup>a</sup>  | 1998               | ST23 Cplx                   | C          | wild animal (Bird of prey) | 2008 | Portugal            |
| SAMEA6471230 <sup>a</sup>  | 1998               | ST23 Cplx                   | C          | wild animal (Bird of prey) | 2008 | Portugal            |
| SAMEA6471227 <sup>a</sup>  | 1998               | NA <sup>b</sup>             | C          | Wild animal (Bird of prey) | 2008 | Portugal            |
| SAMEA6471236 <sup>a</sup>  | 48                 | ST10 Cplx                   | A          | wild animal (wild boar)    | 2006 | Portugal            |
| SAMEA6471231 <sup>a</sup>  | 48                 | ST10 Cplx                   | A          | wild animal (Buzzard)      | 2007 | Portugal            |
| SAMEA6471232 <sup>a</sup>  | 48                 | ST10 Cplx                   | A          | wild animal (Buzzard)      | 2007 | Portugal            |
| SAMEA6471233 <sup>a</sup>  | 48                 | ST10 Cplx                   | A          | wild animal (Buzzard)      | 2007 | Portugal            |
| SAMEA6471238 <sup>a</sup>  | 155                | ST155 Cplx                  | B1         | wild animal (wolf)         | 2008 | Portugal            |
| SAMEA6471240 <sup>a</sup>  | 155                | ST155 Cplx                  | B1         | wild animal (bat)          | 2014 | Portugal            |
| SAMEA6471235 <sup>a</sup>  | 10430              | ST168 Cplx                  | A          | wild animal (wild boar)    | 2006 | Portugal            |
| SAMEA6471234 <sup>a</sup>  | 1800               | NA <sup>b</sup>             | B1         | wild animal (Buzzard)      | 2007 | Portugal            |
| SAMEA6471228 <sup>a</sup>  | 1800               | NA <sup>b</sup>             | B1         | Wild animal (Bird of prey) | 2008 | Portugal            |
| SAMN02471512               | 453                | ST86 Cplx                   | B1         | Human                      | 2011 | Netherlands         |
| SAMN09399352               | 3777               | ST350 Cplx                  | E          | Human                      | 2011 | France              |
| SAMEA6823483 <sup>a</sup>  | 23                 | ST23 Cplx                   | C          | Human                      | 2012 | France              |
| SAMEA6823484 <sup>a</sup>  | 23                 | ST23 Cplx                   | C          | Human                      | 2012 | France              |
| SAMEA6823492 <sup>a</sup>  | 3249               | ST23 Cplx                   | C          | Human                      | 2012 | France              |
| SAMEA6921714 <sup>a</sup>  | 10                 | ST10 Cplx                   | A          | Human                      | 2013 | France (Guadeloupe) |

|                           |      |                 |    |       |      |                  |
|---------------------------|------|-----------------|----|-------|------|------------------|
| SAMEA6823498 <sup>a</sup> | 167  | ST10 Cplx       | A  | Human | 2012 | France           |
| SAMEA6823493 <sup>a</sup> | 746  | ST10 Cplx       | A  | Human | 2012 | France           |
| SAMEA6823496 <sup>a</sup> | 12   | ST12 Cplx       | B2 | Human | 2012 | France           |
| SAMEA6823497 <sup>a</sup> | 12   | ST12 Cplx       | B2 | Human | 2012 | France           |
| SAMEA6823486 <sup>a</sup> | 38   | ST38 Cplx       | D  | Human | 2012 | France           |
| SAMEA6823487 <sup>a</sup> | 38   | ST38 Cplx       | D  | Human | 2012 | France           |
| SAMN04273082              | 131  | ST131 Cplx      | B2 | Human | 2012 | United Kingdom   |
| SAMN13023763              | 131  | ST131 Cplx      | B2 | Human | 2013 | United Kingdom   |
| SAMEA6823489 <sup>a</sup> | 681  | NA <sup>b</sup> | B2 | Human | 2012 | France           |
| SAMEA6823494 <sup>a</sup> | 681  | NA <sup>b</sup> | B2 | Human | 2012 | France           |
| SAMEA6823490 <sup>a</sup> | 141  | NA <sup>b</sup> | B2 | Human | 2012 | France           |
| SAMEA6823491 <sup>a</sup> | 1670 | NA <sup>b</sup> | D  | Human | 2012 | France           |
| SAMEA6921709 <sup>a</sup> | 4421 | NA <sup>b</sup> | B1 | Human | 2012 | France           |
| SAMEA6823499 <sup>a</sup> | 117  | NA <sup>b</sup> | G  | Human | 2012 | France           |
| SAMEA6823495 <sup>a</sup> | 117  | NA <sup>b</sup> | G  | Human | 2012 | France           |
| SAMEA6823488 <sup>a</sup> | 117  | NA <sup>b</sup> | G  | Human | 2012 | France           |
| SAMN05977355              | 117  | NA <sup>b</sup> | G  | Human | 2013 | Netherlands      |
| SAMEA6921715 <sup>a</sup> | 117  | NA <sup>b</sup> | G  | Human | 2013 | France           |
| SAMN05977362              | 58   | ST155 Cplx      | B1 | Human | 2013 | Netherlands      |
| SAMN13023739              | 602  | ST446 Cplx      | B1 | Human | 2013 | United Kingdom   |
| SAMN05977341              | 58   | ST155 Cplx      | B1 | Human | 2012 | Netherlands      |
| SAMEA6921712 <sup>a</sup> | 683  | ST155 Cplx      | B1 | Human | 2013 | France (Reunion) |

|                           |      |                 |    |       |      |                           |
|---------------------------|------|-----------------|----|-------|------|---------------------------|
| SAMEA6921716 <sup>a</sup> | 23   | ST23 Cplx       | C  | Human | 2013 | France<br>(Guadeloupe)    |
| SAMEA6921717 <sup>a</sup> | 2015 | NA <sup>b</sup> | B2 | Human | 2013 | France<br>(Guadeloupe)    |
| SAMN14465408              | 38   | ST38 Cplx       | D  | Human | 2014 | Canada                    |
| SAMEA6921713 <sup>a</sup> | 1170 | NA <sup>b</sup> | B2 | Human | 2014 | France (New<br>Caledonia) |
| SAMN13024512              | 117  | NA <sup>b</sup> | G  | Human | 2014 | United Kingdom            |
| SAMN12145257              | 75   | NA <sup>b</sup> | B1 | Human | 2015 | France                    |
| SAMN12145271              | 616  | ST155 Cplx      | B1 | Human | 2015 | France                    |
| SAMN07325904              | 131  | ST131 Cplx      | B2 | Human | 2016 | USA                       |
| SAMN07325903              | 38   | ST38 Cplx       | D  | Human | 2016 | USA                       |
| SAMN05774074              | 10   | ST10 Cplx       | A  | Human | 2016 | USA                       |
| SAMN12145206              | 117  | NA <sup>b</sup> | G  | Human | 2016 | France                    |
| SAMN12145122              | 117  | NA <sup>b</sup> | G  | Human | 2016 | France                    |
| SAMN12145225              | 88   | ST23 Cplx       | C  | Human | 2016 | France                    |
| SAMN12145164              | 357  | NA <sup>b</sup> | B2 | Human | 2016 | France                    |
| SAMN12145266              | 58   | ST155 Cplx      | B1 | Human | 2016 | France                    |
| SAMN12145137              | 88   | ST23 Cplx       | C  | Human | 2017 | France                    |
| SAMN12768772              | 23   | ST23 Cplx       | C  | Human | 2017 | Australia                 |
| SAMN12145194              | 372  | NA <sup>b</sup> | B2 | Human | 2017 | France                    |
| SAMN09400798              | 3559 | ST469 Cplx      | B1 | Human | 2017 | USA                       |
| SAMEA6921706 <sup>a</sup> | 58   | ST155 Cplx      | B1 | Human | 2018 | France                    |
| SAMEA6921707 <sup>a</sup> | 10   | ST10 Cplx       | A  | Human | 2018 | France                    |

|                           |      |                 |    |                                 |      |                 |
|---------------------------|------|-----------------|----|---------------------------------|------|-----------------|
| SAMEA6921708 <sup>a</sup> | 88   | ST23 Cplx       | C  | Human                           | 2018 | France          |
| SAMEA6921705 <sup>a</sup> | 12   | ST12 Cplx       | B2 | Human                           | 2018 | France          |
| SAMEA6921710 <sup>a</sup> | 12   | ST12 Cplx       | B2 | Human                           | 2019 | France          |
| SAMEA6921711 <sup>a</sup> | 1485 | ST648 Cplx      | F  | Human                           | 2019 | France          |
| SAMEA6921704 <sup>a</sup> | 93   | ST168 Cplx      | A  | Human                           | 2019 | France          |
| SAMEA6378021              | 23   | ST23 Cplx       | C  | Human                           | 2019 | France          |
| SAMEA3512092              | 167  | ST10 Cplx       | A  | Human                           | NS   | NA <sup>c</sup> |
| SAMEA3673016              | 88   | ST23 Cplx       | C  | Human                           | NS   | NA <sup>c</sup> |
| SAMEA6471223 <sup>a</sup> | 206  | ST206 Cplx      | A  | Food producing animal (pig)     | 2008 | Portugal        |
| SAMN02471476              | 453  | ST86 Cplx       | B1 | Food producing animal (pig)     | 2011 | Netherlands     |
| SAMN02471486              | 453  | ST86 Cplx       | B1 | Food producing animal (pig)     | 2011 | Netherlands     |
| SAMN11958806              | 540  | NA <sup>b</sup> | A  | Food producing animal (pig)     | 2019 | USA             |
| SAMEA3753150              | 602  | ST446 Cplx      | B1 | Food producing animal (chicken) | 2015 | United Kingdom  |
| SAMEA3752738              | 602  | ST446 Cplx      | B1 | Food producing animal (chicken) | 2015 | United Kingdom  |
| SAMEA3753147              | 602  | ST446 Cplx      | B1 | Food producing animal (chicken) | 2015 | United Kingdom  |
| SAMEA3753148              | 602  | ST446 Cplx      | B1 | Food producing animal (chicken) | 2015 | United Kingdom  |
| SAMEA3753399              | 602  | ST446 Cplx      | B1 | Food producing animal (chicken) | 2015 | United Kingdom  |
| SAMEA3752316              | 602  | ST446 Cplx      | B1 | Food producing animal (chicken) | 2015 | United Kingdom  |
| SAMEA3752739              | 602  | ST446 Cplx      | B1 | Food producing animal (chicken) | 2015 | United Kingdom  |
| SAMEA3751405              | 602  | ST446 Cplx      | B1 | Food producing animal (chicken) | 2015 | United Kingdom  |
| SAMEA3752741              | 602  | ST446 Cplx      | B1 | Food producing animal (chicken) | 2015 | United Kingdom  |
| SAMEA3751406              | 602  | ST446 Cplx      | B1 | Food producing animal (chicken) | 2015 | United Kingdom  |

|                           |      |                 |    |                                 |      |                |
|---------------------------|------|-----------------|----|---------------------------------|------|----------------|
| SAMEA3752617              | 602  | ST446 Cplx      | B1 | Food producing animal (chicken) | 2015 | United Kingdom |
| SAMEA3485084              | 602  | ST446 Cplx      | B1 | Food producing animal (chicken) | 2015 | United Kingdom |
| SAMN12641083              | 392  | NA <sup>b</sup> | B1 | Food producing animal (bovin)   | 2016 | France         |
| SAMEA3993610              | 345  | ST23 Cplx       | B1 | Food (pork)                     | 2014 | Denmark        |
| SAMEA3993572              | 88   | ST23 Cplx       | C  | Food (pork)                     | 2014 | Denmark        |
| SAMEA3993566              | 101  | ST101 Cplx      | B1 | Food (pork)                     | 2014 | Denmark        |
| SAMN02463220              | 162  | ST469 Cplx      | B1 | Food (pork)                     | 2014 | Denmark        |
| SAMEA3753386              | 5952 | ST206 Cplx      | A  | Food (pork)                     | 2014 | United Kingdom |
| SAMEA3752514              | 5952 | ST206 Cplx      | A  | Food (pork)                     | 2014 | United Kingdom |
| SAMN13738180              | 58   | ST155 Cplx      | B1 | Food (pork)                     | 2017 | South Korea    |
| SAMEA6471221 <sup>a</sup> | 206  | ST206 Cplx      | A  | Food (chicken)                  | 2008 | Portugal       |
| SAMN02471484              | 10   | ST10 Cplx       | A  | Food (chicken)                  | 2010 | Netherlands    |
| SAMN02390174              | 117  | NA <sup>b</sup> | G  | Food (chicken)                  | 2012 | USA            |
| SAMN02390175              | 6707 | NA <sup>b</sup> | A  | Food (chicken)                  | 2013 | USA            |
| SAMN07624461              | 23   | ST23 Cplx       | C  | Food (chicken)                  | 2015 | USA            |
| SAMN07624453              | 117  | NA <sup>b</sup> | G  | Food (chicken)                  | 2013 | USA            |
| SAMEA3485102              | 5956 | NA <sup>b</sup> | A  | Food (chicken)                  | 2015 | United Kingdom |
| SAMEA3485100              | 602  | ST446 Cplx      | B1 | Food (chicken)                  | 2015 | United Kingdom |
| SAMEA3485111              | 57   | ST350 Cplx      | E  | Food (chicken)                  | 2015 | United Kingdom |
| SAMEA3485105              | 602  | ST446 Cplx      | B1 | Food (chicken)                  | 2015 | United Kingdom |
| SAMN10221082              | 134  | NA <sup>b</sup> | B2 | Food (chicken)                  | 2017 | USA            |
| SAMN12943438              | 155  | ST155 Cplx      | B1 | Food (chicken)                  | 2019 | USA            |

|              |      |                 |    |                       |      |                 |
|--------------|------|-----------------|----|-----------------------|------|-----------------|
| SAMN12943740 | 101  | ST101 Cplx      | B1 | Food (chicken)        | 2019 | USA             |
| SAMN12911910 | 224  | NA <sup>b</sup> | B1 | Domestic animal (cat) | 2014 | Poland          |
| SAMN12911909 | 224  | NA <sup>b</sup> | B1 | Domestic animal (cat) | 2014 | Poland          |
| SAMN08519283 | 58   | ST155 Cplx      | B1 | Domestic animal (dog) | 2015 | Germany         |
| SAMN08519253 | 973  | NA <sup>b</sup> | D  | Domestic animal (dog) | 2015 | Germany         |
| SAMN08519245 | 973  | NA <sup>b</sup> | D  | Domestic animal (dog) | 2015 | Germany         |
| SAMN08519214 | 101  | ST101 Cplx      | B1 | Domestic animal (dog) | 2015 | Germany         |
| SAMN08519216 | 10   | ST10 Cplx       | A  | Domestic animal (dog) | 2015 | Germany         |
| SAMN08519212 | 10   | ST10 Cplx       | A  | Domestic animal (dog) | 2015 | Germany         |
| SAMN08519209 | 10   | ST10 Cplx       | A  | Domestic animal (dog) | 2015 | Germany         |
| SAMN08519278 | 162  | ST469 Cplx      | B1 | Domestic animal (dog) | 2015 | Germany         |
| SAMN12601668 | 2329 | NA <sup>b</sup> | B1 | Domestic animal (dog) | 2018 | Canada          |
| SAMN13556354 | 1970 | NA <sup>b</sup> | A  | Municipal wastewater  | 2016 | Czech Republic  |
| SAMEA1324851 | 1421 | ST46 Cplx       | A  | NS                    | 2012 | NA <sup>c</sup> |
| SAMEA1324881 | 174  | NA <sup>b</sup> | G  | NS                    | 2012 | NA <sup>c</sup> |
| SAMEA1324840 | 117  | NA <sup>b</sup> | G  | NS                    | 2012 | NA <sup>c</sup> |

---

<sup>a</sup>, data provided by the present study, <sup>b</sup> Not applicable, <sup>c</sup> data not available

**Table S3:** Circularized *bla*<sub>CTX-M-1</sub>-encoding plasmids IncI1-ST3 included in this study.

| Accession number          | ID            | Sample source                   | Year      | Country     |
|---------------------------|---------------|---------------------------------|-----------|-------------|
| SAMN14226788              | pH2291-112    | Human                           | 2013      | Switzerland |
| SAMN14226492              | pHV295        | Human                           | 2013-2014 | Switzerland |
| SAMN14227914              | pESBL20150097 | Human                           | 2015      | Denmark     |
| SAMN14227913              | pESBL20150178 | Human                           | 2015      | Denmark     |
| SAMEA6471236 <sup>a</sup> | pJ31          | Wild animal (Wild boar)         | 2006      | Portugal    |
| SAMEA6471229 <sup>a</sup> | p2-101        | Wild animal (Bird of prey)      | 2008      | Portugal    |
| SAMN14226780              | pC59-112      | Food producing animal (chicken) | 2012      | Switzerland |
| SAMN14226782              | pC60-108      | Food producing animal (chicken) | 2013      | Switzerland |
| SAMN14226779              | pC49-108      | Food producing animal (chicken) | 2013      | Switzerland |
| SAMN14224470              | pESBL-305     | Food producing animal (chicken) | 2014      | Netherlands |
| SAMN14226373              | p369          | Food producing animal (chicken) | 2014      | France      |
| MN419433                  | p20426        | Food producing animal (chicken) | 2016      | Norway      |
| MN419434                  | p21249        | Food producing animal (chicken) | 2016      | Norway      |
| MN419436                  | p22440        | Food producing animal (chicken) | 2016      | Norway      |
| MN419437                  | p22638        | Food producing animal (chicken) | 2016      | Norway      |
| MN419438                  | p24003        | Food producing animal (chicken) | 2016      | Norway      |
| SAMN14226494              | pHV114        | Food producing animal (broiler) | 2013-2014 | Switzerland |
| SAMN14226493              | pHV292        | Food producing animal (broiler) | 2013-2014 | Switzerland |
| SAMN07197440              | pCOV31        | Food producing animal (gallus)  | 2010-2012 | France      |

|                |                |                                |                 |             |
|----------------|----------------|--------------------------------|-----------------|-------------|
| SAMN07197441   | pCOV32         | Food producing animal (gallus) | 2016            | France      |
| SAMN09867582   | p04-021        | Food producing animal (pig)    | 2004            | France      |
| SAMN03067748   | FAP1 plasmid 2 | Food producing animal (pig)    | 2011            | Netherlands |
| SAMN14227733   | pCTXM1-MU2     | Food producing animal (pig)    | 2014            | Australia   |
| SAMN14227922   | p199           | Food producing animal (pig)    | 2015            | Denmark     |
| SAMN14227919   | p15090172      | Food producing animal (pig)    | 2015            | Denmark     |
| SAMN09867573   | p17-348F       | Food producing animal (pig)    | 2017            | France      |
| SAMN09867593   | p17-461F       | Food producing animal (pig)    | 2017            | France      |
| SAMN02390175   | pTC_N40607     | Food (chicken)                 | 2012            | USA         |
| SAMN14227924   | p14019095      | Food (chicken)                 | 2014            | Denmark     |
| SAMN14227921   | p14006165      | Food (chicken)                 | 2014            | Denmark     |
| SAMN14227920   | p14011252      | Food (chicken)                 | 2014            | Denmark     |
| SAMN14227918   | p15095941      | Food (chicken)                 | 2015            | Denmark     |
| SAMN14227917   | p15124679      | Food (duck)                    | 2015            | Denmark     |
| SAMN14227923   | p15076331      | Food (pork)                    | 2015            | Denmark     |
| SAMN14228301   | p2305          | Domestic animal (dog)          | 2012-2016       | Switzerland |
| SAMEA104588824 | RCS34_p        | NA <sup>c</sup>                | NA <sup>c</sup> | France      |
| SAMEA104588796 | RCS72_pI       | NA <sup>c</sup>                | NA <sup>c</sup> | France      |
| SAMEA104588798 | RCS75_pI       | NA <sup>c</sup>                | NA <sup>c</sup> | France      |
| SAMEA104588797 | RCS76_pI       | NA <sup>c</sup>                | NA <sup>c</sup> | France      |

<sup>a</sup>, this study ; <sup>c</sup>, data not available.

**Figure S1:** Frequency (a) and correlation index (b) of antibiotic resistance genes in non-redundant *E. coli* harboring *bla*<sub>CTX-M-1</sub> and Inc11-ST3 plasmids.

a

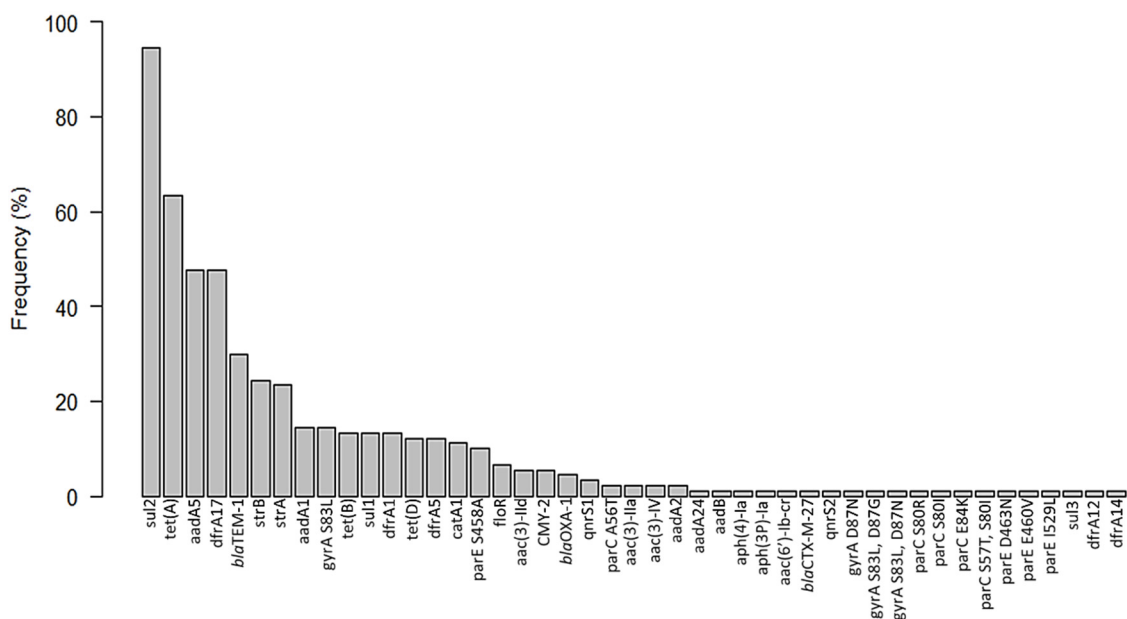

b

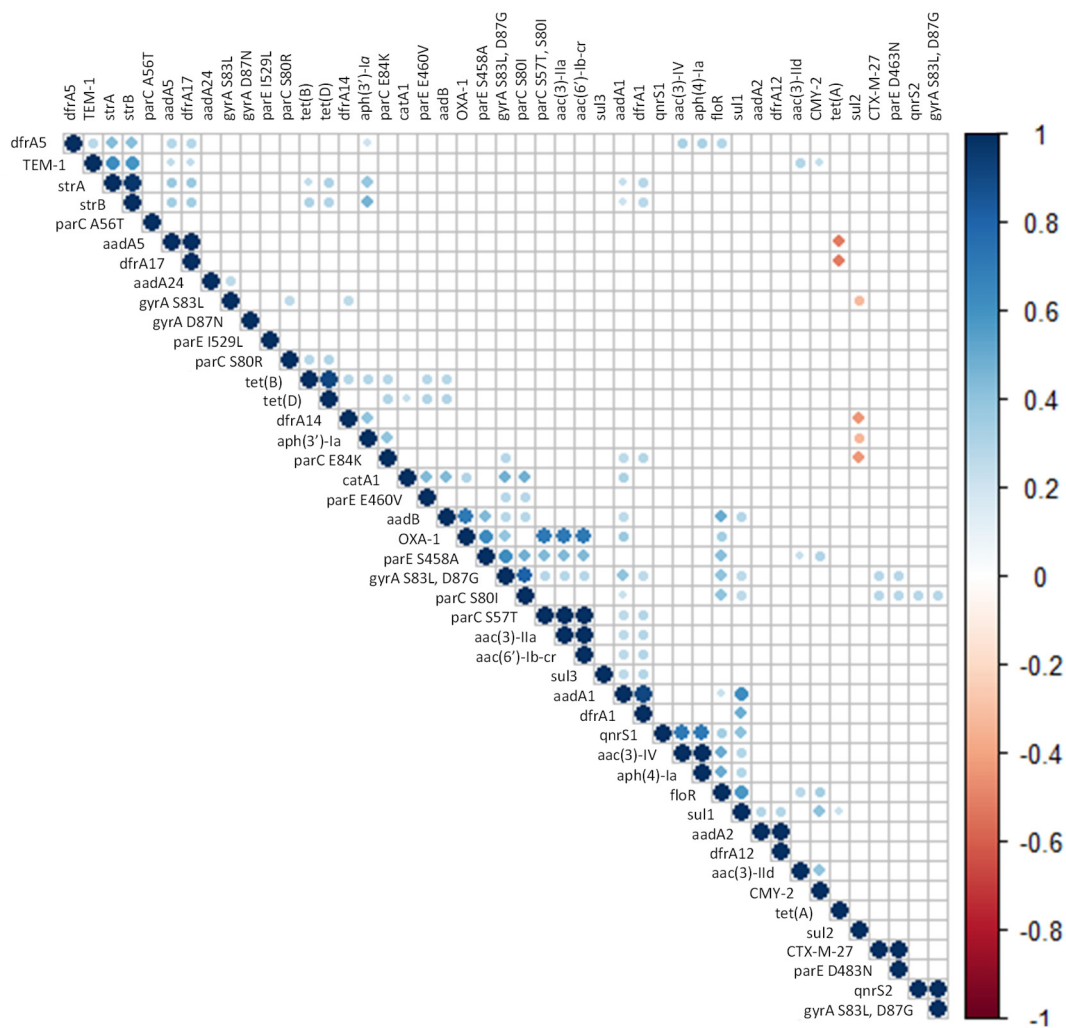

**Figure S2:** Multiple corresponding analysis performed from the synteny of shufflon region of *bla*<sub>CTX-M-1</sub> IncII-ST3 plasmids, which were extracted from 77 WGSs. The resulting clusters are surrounded by 95% confidence ellipses and are supported by statistic tests (Adonis test's p-value: <0.001 and R<sup>2</sup>: 0.98). The most contributory genetic features are indicated in red (B#: shuffling segment B ; #: position of the genetic feature, rv: reverse and fd: forward).

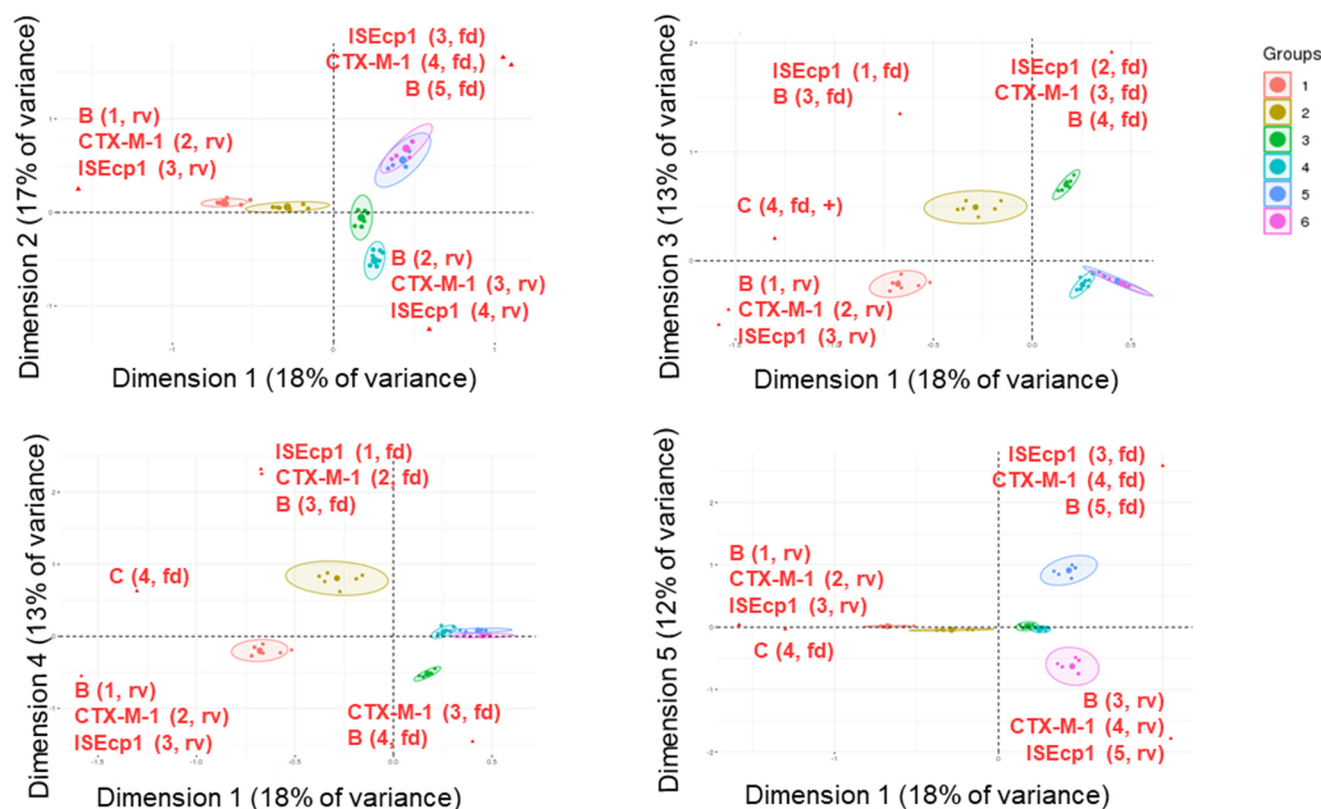

**Figure S3:** Heatmap showing the presence (red) and the absence (blue) of synteny blocks in the shufflon region of plasmids IncI1-ST3-*bla*<sub>CTX-M-1</sub>. The dataset was extracted from WGSs containing assembled shufflons (referred to as biosample accession number). The genetic features of shufflons are indicated (A: shufflon segment A, B: shufflon segment B, C: shufflon segment C, CTX-M-1: *bla*<sub>CTX-M-1</sub> and *ISEcp1*) with the position of the genetic feature in the synteny (index number) and its orientation (rv: reverse and fd: forward) as well as metadata and the clusters derived from MCA and HC analysis (C#).

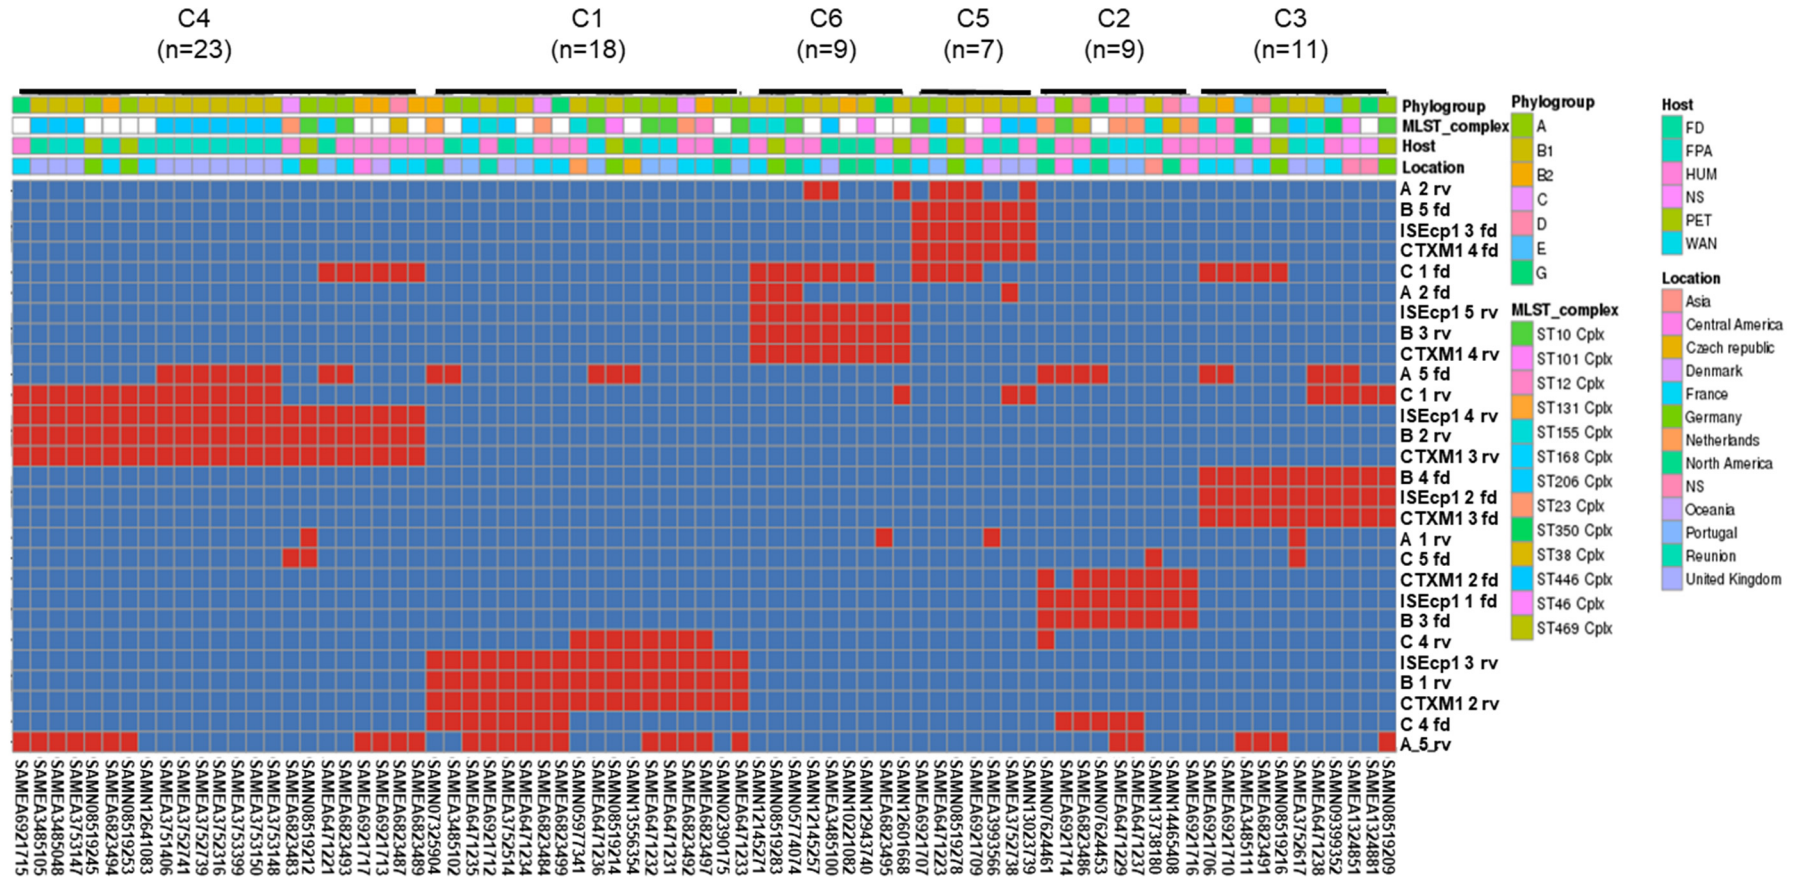

**Figure S4:** Hierarchical classification of plasmids IncI1-ST3-*bla*<sub>CTX-M-1</sub> based on the synteny of the shufflon region. The dataset was extracted from WGSs containing assembled shufflons (referred to as biosample accession number). The synteny is reported with the genetic features indicated as arrows (orange: recombinase gene *rci*, mauve: shufflon segment, blue: shufflon segment B, black: *ISEcp1*, red: *bla*<sub>CTX-M-1</sub>, green: shufflon segment, violet: *pilV* and yellow: *pilRST*). The shufflons having identical synteny are surrounded by black boxes and those with identical location and source are highlighted. The table reports geographic origin (AS: Asia, CA: Central America, CZ: Czech Republic, DE: Germany, FR: France, GU: Guyana, NA: North America, NC: New Caledonia, NL: Netherlands, PT: Portugal and UK: United-Kingdom) and the sample source (HUM: human, FD: food, FPA: food-producing animal, PET: companion animal and WAN: wild animal).

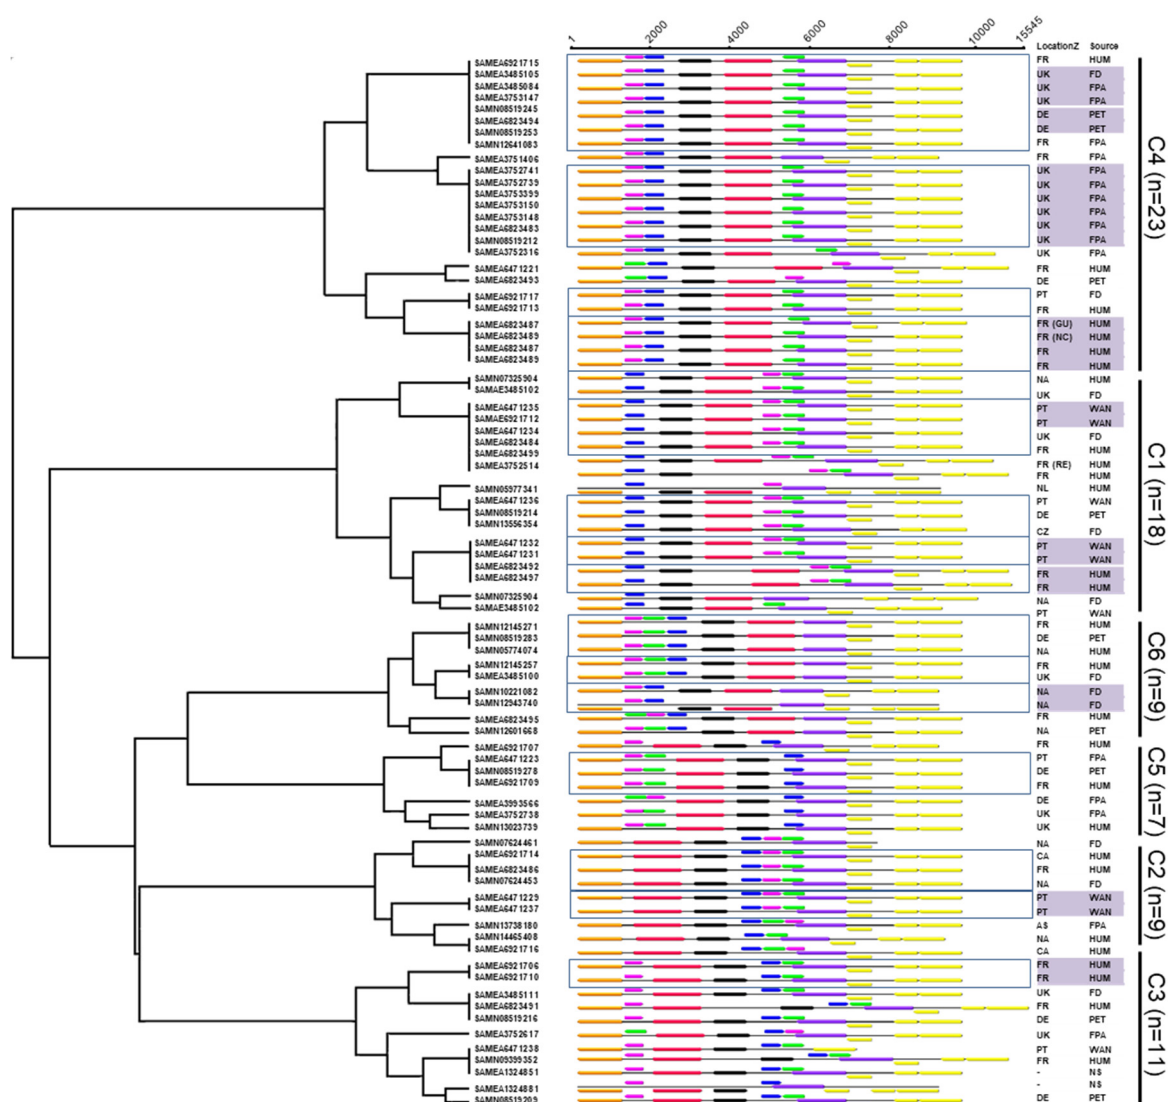

Supplement: s1 [file s1]
